# Supplementary material for: Preservation of vascular endothelial repair in mice with diet‐induced obesity
Source: PubMed Central journal article supplement (PMC6180714; doi:10.1002/osp4.282), 2018-06-26

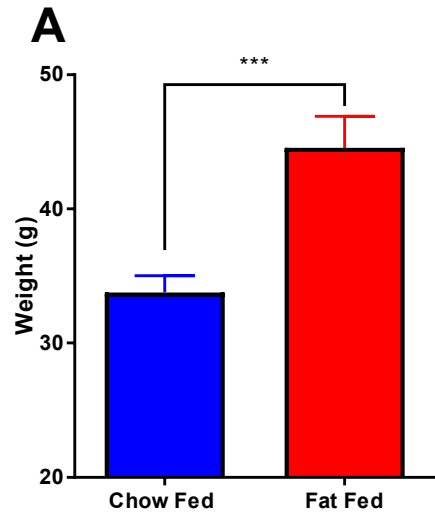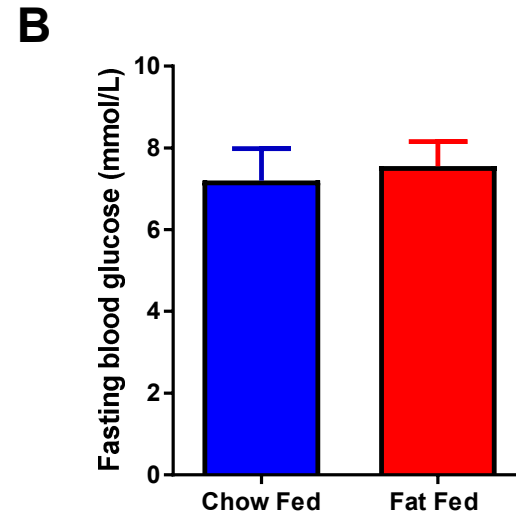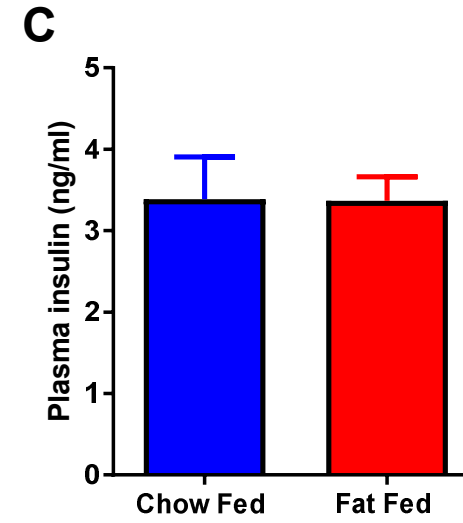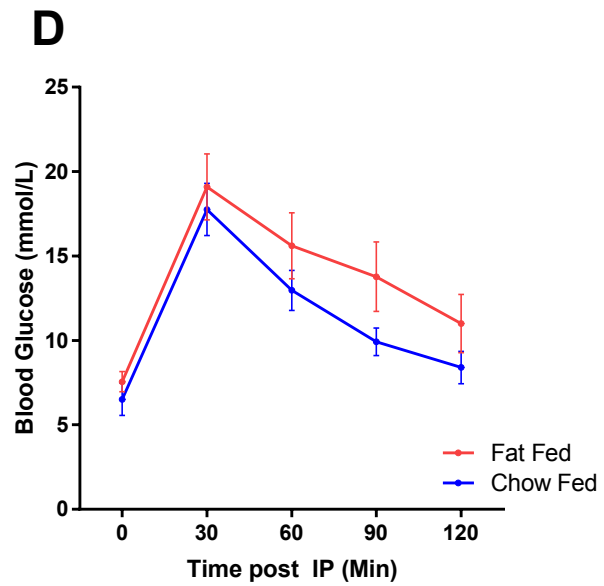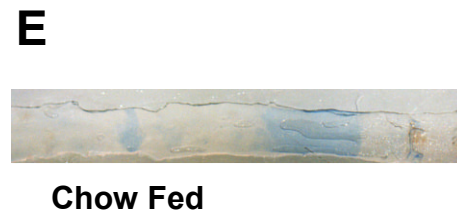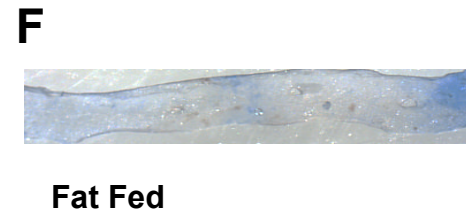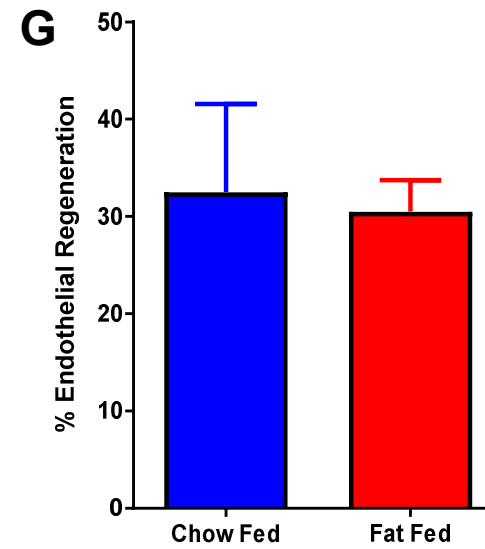

Supplement: OSP4-4-490-s001.pdf [file OSP4-4-490-s001.pdf]
